# Supplementary material for: Reversal of Trimethyltin‐Induced Learning and Memory Deficits by 3,5‐Dicaffeoylquinic Acid
Source: Hindawi journal article supplement (doi:10.1155/2016/6981595), 2016-01-01
Supplement: f1 [file 6981595.f1.doc]

Supplementary Materials


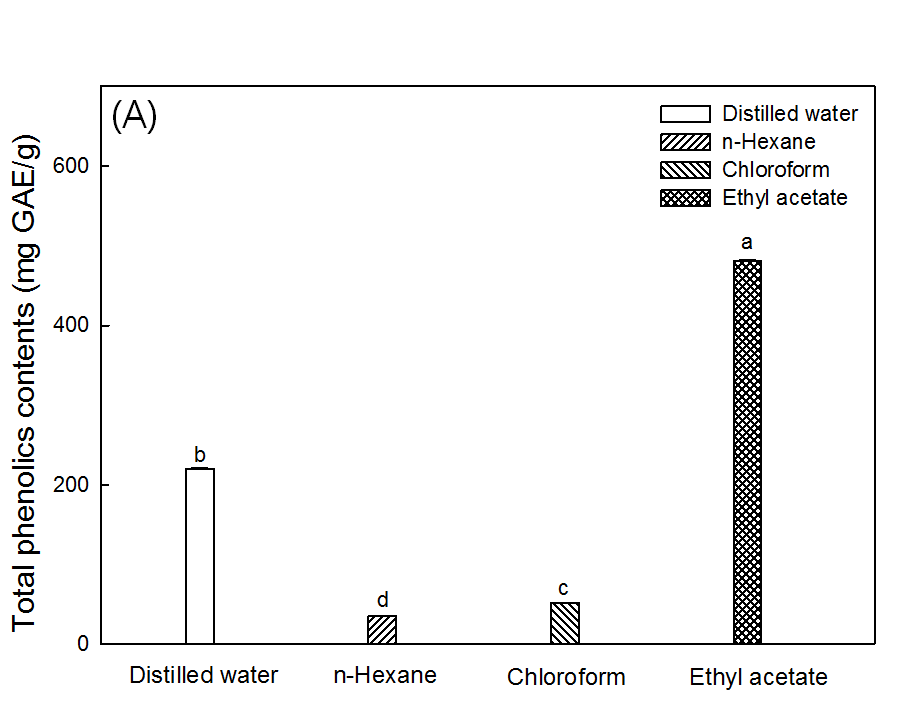


**Figure 1.** Total phenolics contents of various solvent fractions from *Artemisia argyi* H. extract. Data shown represent means ± SD (n=3). Statistical differences were represented using different small letters (𝑝< 0.05).


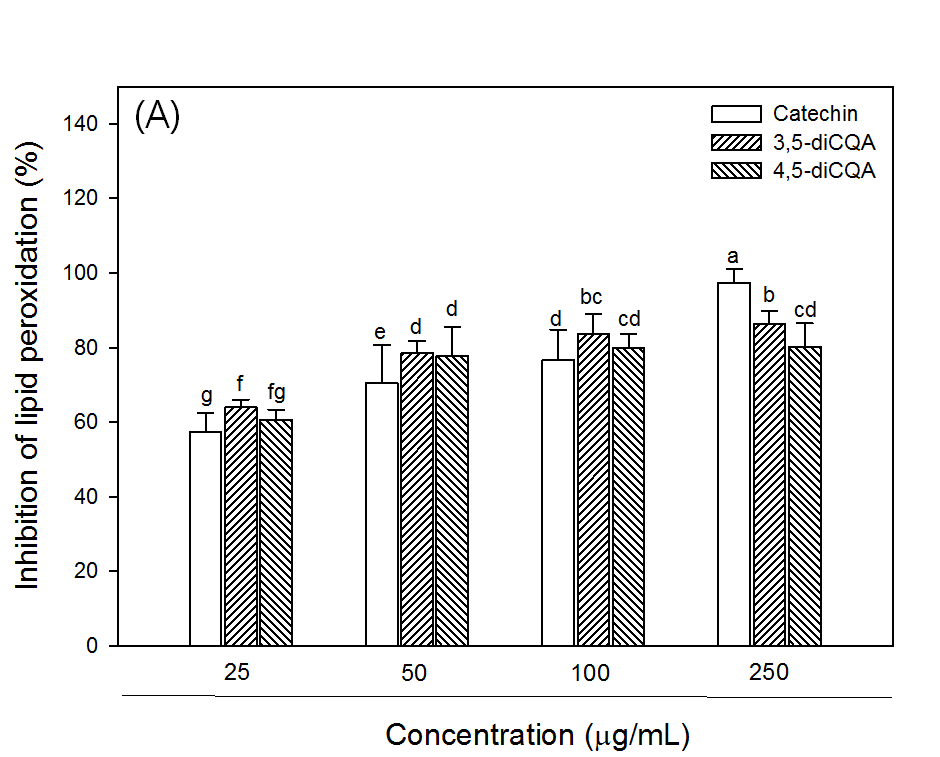


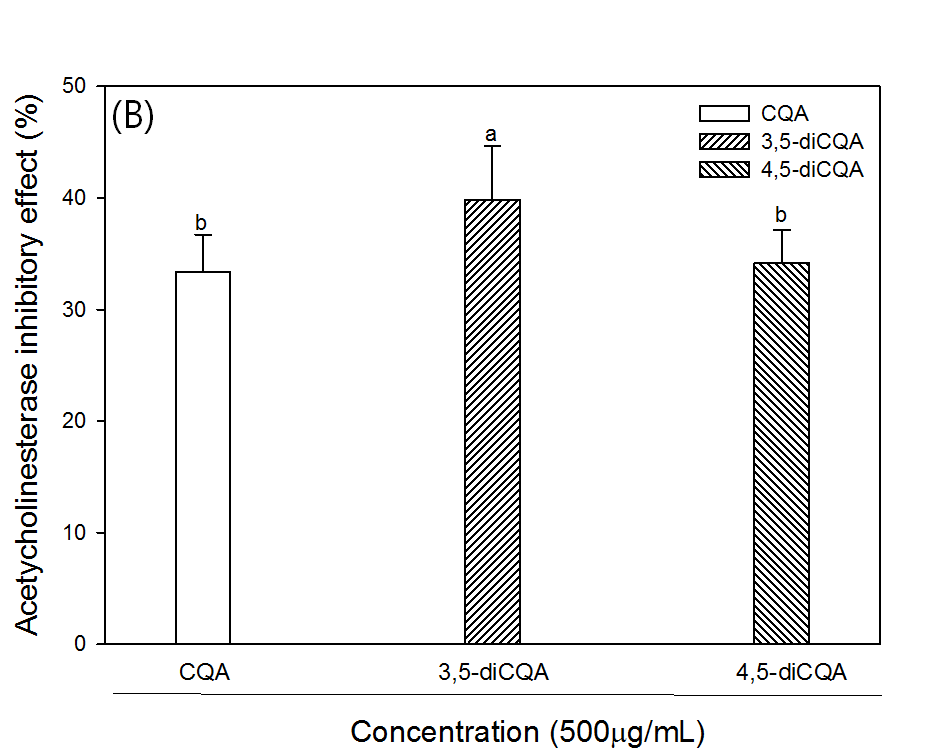


**Figure 2.** Effect of 3,5-diCQA and 4,5-diCQA on lipid peroxidation and AChE activity. Inhibition of lipid peroxidation (A) compared with catechin as positive control and AChE inhibitory effect (B). Data shown represent means ± SD (n=3). Statistical differences were represented using different small letters (𝑝< 0.05).
